# Supplementary material for: Quadruple-editing of MAPK and PI3K pathways effectively blocks the progression of KRAS-mutated colorectal cancer cells
Source: Research Square preprint supplement (doi:10.21203/rs.3.rs-230629/v1), 2021-02-24
Supplement: Supplementary file 2 [file c94e54f3ae1e3da1461eeecb.docx]

**
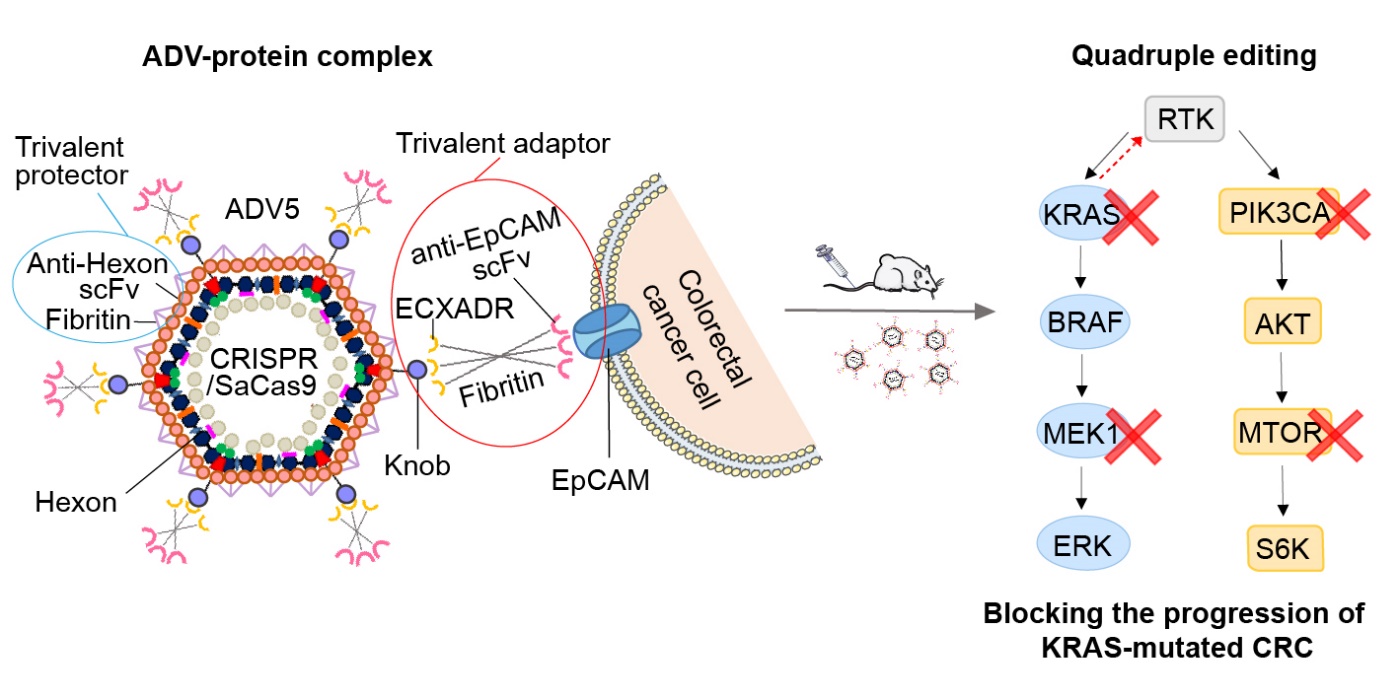
**

**Figure S5. Graphical abstract.** A quadruple depleting system of KRAS, MEK1, PIK3CA and MTOR, which was delivered by ADV5-protein complex (ADV5 surrounded by adaptor and protector proteins) *in vivo*, could effectively and specifically blocked the tumor progression of KRAS-mutated CRC models.
