# Supplementary material for: Quadruple-editing of MAPK and PI3K pathways effectively blocks the progression of KRAS-mutated colorectal cancer cells
Source: Research Square preprint supplement (doi:10.21203/rs.3.rs-230629/v1), 2021-02-24
Supplement: Supplementary file 3 [file cad9f54829c00fa4de936840.docx]

**
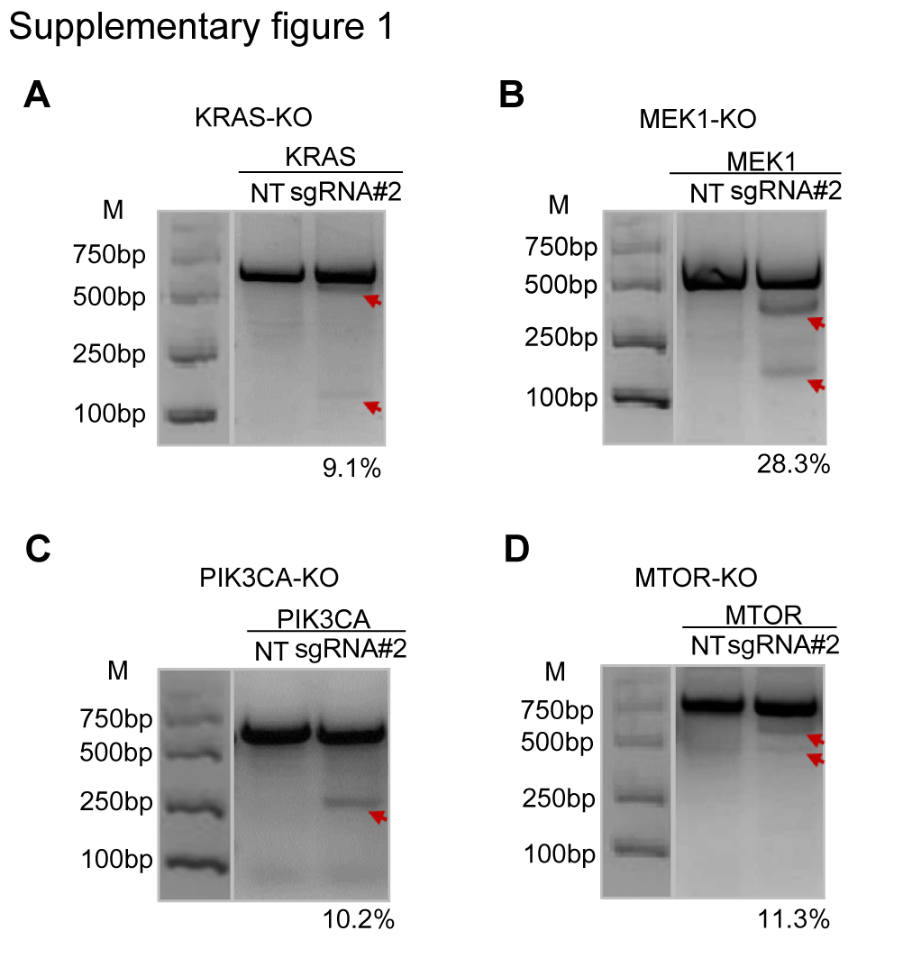
**

**Figure S2. Editing effects of single-editing vectors carrying another non-overlapping gRNA for the four target genes in 293T cells respectively.**

The effects of single-editing vectors carrying another non-overlapping gRNA for KRAS, MEK1, PIK3CA and MTOR (#2) were respectively detected by T7E1 assays (A-D). NT indicated non-targeting control. The red arrows denoted the cleavage products of T7E1 assay. The editing efficiencies were listed below the graphs.
